25 **Abstract**

26

27 Single-cell RNA sequencing studies into gene co-expression patterns could yield  
28 important new regulatory and functional insights, but have so far been limited by the  
29 confounding effects of cell differentiation and the cell cycle. We apply a tailored  
30 experimental design that eliminates these confounders, and report >80,000 intrinsically  
31 covarying gene pairs in mouse embryonic stem cells. These covariances form a network  
32 with biological properties, outlining known and novel gene interactions. We provide the  
33 first evidence that miRNAs naturally induce transcriptome-wide covariances, and  
34 compare the relative importance of nuclear organization, transcriptional and post-  
35 transcriptional regulation in defining covariances. We find that nuclear organization has  
36 the greatest impact, and that genes encoding for physically interacting proteins  
37 specifically tend to covary, suggesting importance for protein complex stoichiometry.  
38 Our results lend support to the concept of post-transcriptional '*RNA operons*', but we  
39 further present evidence that nuclear proximity of genes on the same or even distinct  
40 chromosomes also provides substantial functional regulation in mammalian single cells.

41

42

## 43 **Introduction**

44

45 Two genes that increase or decrease coordinately in expression over multiple conditions  
46 are said to covary in expression. Gene expression covariance can be studied over two  
47 conditions (for instance healthy and diseased tissue), over time-series experiments, or  
48 in meta-studies spanning hundreds of tissues and cell types, for instance from public  
49 expression repositories <sup>1-3</sup>. Over the last 20 years, these studies have yielded numerous  
50 important biological insights since covarying genes are often functionally related and  
51 commonly share the same gene regulatory mechanisms.

52

53 In the last ten years, new single-cell sequencing methods have emerged, making it  
54 possible to profile entire transcriptomes of individual cells <sup>4-6</sup>. This makes it possible to  
55 identify genes that covary in expression across individual cells, considering in effect  
56 every cell as a distinct condition. This research direction holds great promise, since it  
57 could reveal biological covariances that are not detectable in analysis of bulk cell  
58 populations. First, differences in cellular compositions between samples may disturb  
59 covariance analyses in bulk tissues <sup>7</sup>. Further, transcripts can appear to be constantly  
60 and moderately expressed in all studied tissues or cell cultures, but may in fact display  
61 temporally fluctuating and covarying expression in single cells. This latter type of  
62 covariances may never be detected in bulk tissues. However, until now transcriptome-  
63 wide single-cell studies of such intrinsic gene covariance patterns have been limited by  
64 confounding factors such as cell cycle progression and cell differentiation, that are  
65 extrinsic to the genes of interest <sup>8,9</sup>. These confounding factors induce a strong impact on  
66 the global covariance patterns, which could overshadow the more subtle - and  
67 potentially more interesting - underlying patterns.

68

69 Here, we apply carefully designed experimental conditions to remove the confounding  
70 extrinsic effects of differentiation and cell cycle progression, and apply sensitive Smart-  
71 Seq2 single-cell sequencing to profile the transcriptomes of hundreds of mouse  
72 embryonic stem cells (mESCs). Specifically, using stringent cut-offs we report >80,000  
73 gene pairs that intrinsically covary in expression; more than have been described in  
74 previous single-cell studies. The covarying gene pairs interlink to form a network with  
75 well-established biological features, following a so-called power-law distribution, and  
76 recover known regulatory patterns and pathways. We further apply a novel  
77 computational framework to study the relative importance of distinct regulatory  
78 mechanisms for gene expression covariances. We find that genes regulated by the same

79 transcription factors or miRNAs tend to covary, while the strongest effect is seen with  
80 genes that are in nuclear proximity on the same chromosomes. A similar but weaker  
81 effect is seen for genes that are in nuclear proximity on distinct chromosomes. We  
82 validate that a subset of the covariances are directly induced by miRNAs by repeating  
83 our entire experiment in miRNA-deficient cells.

84

85 Last, we test two competing hypotheses regarding the putative function of gene  
86 expression covariances. The first hypothesis states that genes covary in expression to  
87 ensure stoichiometric abundances of proteins that function in the same pathway, while  
88 the second hypothesis proposes that covariances are important for proper  
89 stoichiometry of proteins that are part of the same complexes. We find that covarying  
90 genes only tend to share the same function if their encoded proteins also physically  
91 interact, lending evidence to the “protein complex” hypothesis.

92

93 In summary, we have combined single-cell RNA sequencing with a tailored experimental  
94 design and novel computational analyses to quantify regulatory drivers in single  
95 mammalian embryonic stem cells, highlighting the importance of nuclear proximity for  
96 gene expression covariances. Additionally, we present evidence that these covariances  
97 play roles in ensuring stoichiometry between interacting proteins.

98

99

## 100 **Results**

101

### 102 **Smart-Seq2 sequencing of hundreds of mouse single-cell transcriptomes**

103 To obtain reliable and reproducible measurements of gene expression for our study, we  
104 applied the Smart-Seq2 protocol to sequence the transcriptomes of 567 individual  
105 mouse embryonic stem cells divided between three well-plates which serve as biological  
106 replicates. The Smart-Seq2 protocol is one of the gold standards in the single-cell field.  
107 While labor-intensive and not easily scalable, it is highly sensitive and precise, which  
108 means that each measurement is less affected by technical noise <sup>6,10,11</sup>. It also reliably  
109 detects both exons and introns, which is useful for distinguishing transcriptional and  
110 post-transcriptional regulation <sup>12</sup>. We performed strict quality filtering on the initial set  
111 of cells, which resulted in a total of 355 cells considered (Methods, Suppl. Fig. 1, Suppl.  
112 Table 1). Gene expression values in each cell were normalized to the sum of mRNA  
113 sequence reads in the given cell, as this approach was found to best eliminate biases  
114 from technical factors (Methods, Suppl. Fig. 2, 3). We considered a gene to be reliably  
115 profiled if its transcript was detected in at least half of the cells in each of the three  
116 replicates. Importantly, we estimated that for genes that are expressed at above 16  
117 reads per million biological variation between cells exceeds technical noise (as  
118 estimated by ERCC spike-ins, Suppl. Fig. 4). The vast majority of the genes that fulfill our  
119 criteria for reliable detection also exceeds this expression threshold. Overall our  
120 analysis yielded reliable gene expression measurements for 8,983 genes (Suppl. Table  
121 2).

122

### 123 **Homogenous cell population unconfounded by cell cycle or differentiation**

124 For the sequencing experiment, we took several precautions to eliminate the  
125 confounding extrinsic effects of cell cycle and differentiation. First, all cells were  
126 cultured in 2i+LIF medium which is a well-established protocol to maintain embryonic  
127 stem cells in a homogeneous pluripotent state, excluding potential differentiation effects  
128 <sup>13</sup>. Second, the cells used in this experiment were derived from a single cell through  
129 clonal expansion ensuring genetic identity. It is well-established that genetically  
130 identical mES cells cultured in 2i+LIF have remarkably similar chromatin states and  
131 transcriptomes <sup>14,15</sup>. Third and finally, we used fluorescence activated cell sorting to  
132 specifically select cells in G2/M phase of the cell cycle, thus excluding major cell cycle  
133 effects. This particular combination of growth medium (2i+LIF) and cell cycle phase  
134 (G2/M) has been reported to generate particularly homogeneous cell populations with  
135 regard to their transcriptome signatures <sup>9</sup>. Using published marker genes, we confirmed

136 that our cells were in the correct cell cycle phase <sup>13,16</sup> and expressed pluripotency but  
 137 not differentiation marker genes <sup>9,17</sup> (Suppl. Fig. 5). Altogether our cells comprise a  
 138 homogenous population, unconfounded by cell cycle or differentiation effects.

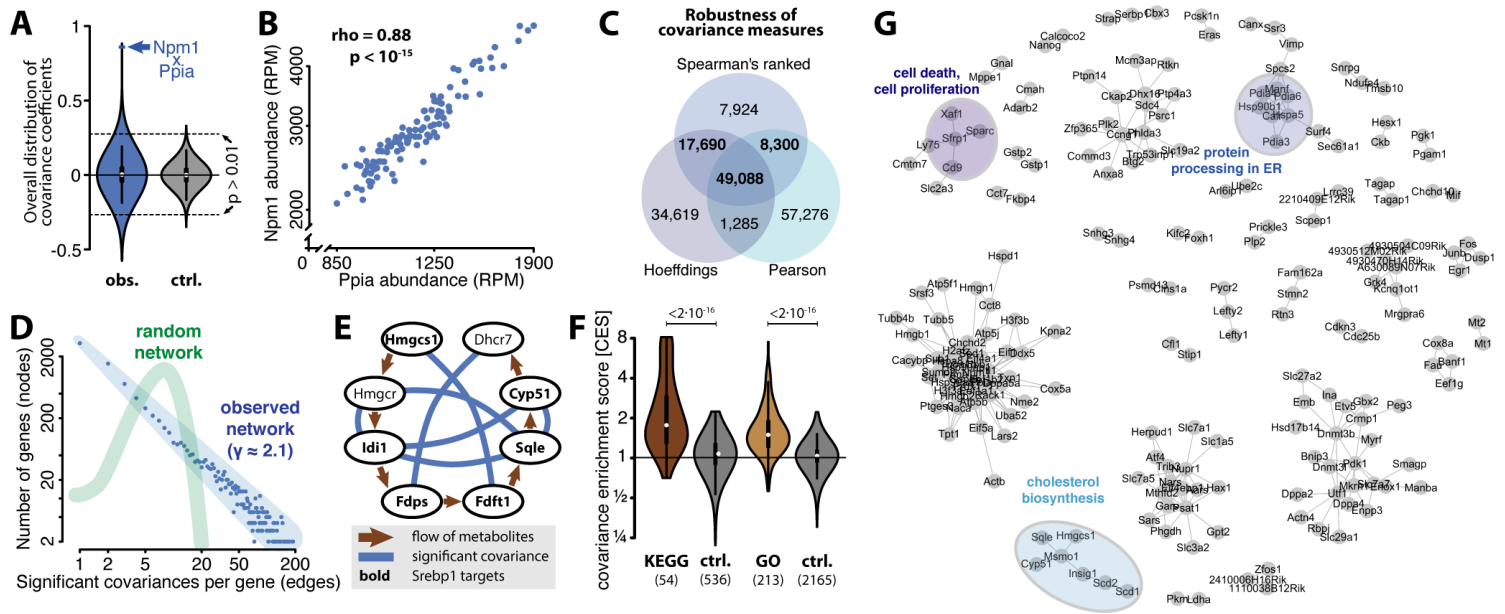

139  
 140 **Figure 1: Covariance network reflects biological features.** (A) Transcriptome-wide  
 141 covariance (co-expression) values for all possible gene pairs. Violin plot of Spearman's ranked  
 142 statistics (rho-value) for the entire transcriptome (blue) and for a permuted control matrix  
 143 (grey). Value for the gene pair *Npm1* - *Ppia* is highlighted. (B) Covariance of the genes *Ppia* and  
 144 *Npm1*. Abundances for the two genes are in reads per million (RPM) and plotted in log scale. Each  
 145 data point represents their respective measurement in the same single cell. (C) Spearman's  
 146 ranked coefficients is in accordance with other covariances and dependency measures. (D) Gene  
 147 covariance network is scale-free. Number of significant covariances per gene against the number  
 148 of genes with that number of covariances. Blue line illustrates a scale-free network that captures  
 149 the data points ( $y \approx 2.1$ ). Green line illustrates the degree distribution of a random network with  
 150 same number of genes (nodes) and covariances (edges) as the observed network. (E) Cholesterol  
 151 biosynthesis pathway is highly enriched for gene pair covariances. Genes involved in cholesterol  
 152 biosynthesis from acetyl-CoA. Only genes that were robustly detected in our sequencing data are  
 153 shown. Arrows indicate the flow of metabolites, lines indicated significant covariance between  
 154 genes. Gene names in bold indicated direct targets of *Srebp1*, a transcription factor that is well  
 155 known to regulate cholesterol biosynthesis. (F) Gene sets that share functional annotations are  
 156 enriched for covariances. Gene covariance enrichment scores (CES) for gene sets sharing the  
 157 same gene ontology or sharing the same KEGG pathway annotation as well as respective controls.  
 158 Gene covariance enrichment scores indicate the ratio of observed significant covariances relative  
 159 to the amount of expected covariances (see main text). (G) Example sub-network.

161 **Discovery of >80,000 significant positive and negative gene covariances**

162 To study pairwise gene covariances, we calculated Spearman's rank correlation  
 163 coefficient for all possible gene pairs. We chose this procedure for its ability to detect

164 non-linear monotonous dependencies and for its robustness towards outliers. The  
165 calculation of covariance coefficients with Spearman's was performed separately on  
166 each of the three biological replicates. The measured covariance coefficients were  
167 centered around zero (Figure 1A, left), indicating the absence of overall confounding  
168 factors, and importantly, the observed covariance values had a bigger spread than those  
169 of permuted controls (Figure 1A), suggesting the presence of numerous non-random  
170 biological covariances. We then defined covariances to be overall significant if their  
171 coefficients were significant ( $p < 0.01$ ) in two out of the three replicates and had the  
172 same sign in all three replicates. This approach resulted in 81,820 significantly  
173 covarying unique gene pairs (52,695 positively and 29,125 negatively). Using stringent  
174 permuted controls, we estimated the false discovery rate of these covariances to be  
175 lower than 1.6% (Methods). An example for a highly significant gene pair is shown in  
176 Fig. 1B, where each data point represents one individual cell. Significant covariances  
177 identified with Spearman's ranked correlation coefficient have a high overlap with those  
178 retrieved by Pearson's correlation coefficient, and with dependency measures recovered  
179 through Hoeffding's D statistics (Fig. 1C), showing the robustness of the approach.  
180 Finally, we validated several of the gene expression covariances using single-molecule  
181 FISH and single-cell quantitative RT-PCR (Suppl. Fig. 11, 12). In summary, we present  
182 >80,000 high-confidence gene pair covariances; more than have been reported in  
183 previous single-cell studies.

184

### 185 **Properties of the covariance network reflect biological functions**

186 We observed that the covarying gene pairs link together in complex patterns that can be  
187 described as a network. It is well-established that biological networks, such as those  
188 arising from transcription factor or protein interactions, have properties that are  
189 different from random networks<sup>18</sup>. For instance, biological networks tend to follow  
190 power law distributions, such that most genes have only few interactions with other  
191 genes while few genes represent hubs in the network, interacting with many other  
192 genes. Consistent with our network having biological rather than technical origins, we  
193 found that our covariance network follows such a power distribution ( $\gamma \approx 2.1$ , Figure 1D,  
194 light blue). Importantly, this network structure is distinctly different from that of a  
195 random network with the same overall connectivity (Figure 1D, light green). Further  
196 network features are listed in Suppl. Fig. 7D.

197

198 Within the covariance network, we identified many biologically meaningful  
199 subnetworks, such as the one formed by genes involved in cholesterol biosynthesis (Fig.

200 1E). Genes involved in cholesterol biosynthesis are activated when the SREBF1  
201 transcription factor is cleaved from the cell membranes and shuttles to the nucleus in  
202 response to lack of cholesterol <sup>19</sup> and can therefore be expected to covary in expression,  
203 depending on the localization of SREBF1 protein. Another notable sub-network is  
204 formed by genes involved in the formation of the TCP1 ring complex, a chaperone  
205 involved in tubulin biogenesis <sup>20</sup> (Suppl. Fig. 8).

206

207 A substantial part of the observed covariances (~14,500 gene pairs) are between  
208 ribosomal proteins. While these are interesting and have been reported before for bulk  
209 cell populations <sup>21</sup>, the exact mechanism behind ribosomal protein co-expression in  
210 eukaryotes remains cryptic, and we have excluded them from analysis in the sections  
211 below. It was recently reported that four of these proteins (RPL10, RPL38, RPS7, RPS25)  
212 are optional components of the ribosome, whose inclusion or exclusion can influence  
213 which pools of transcripts are preferentially translated <sup>22</sup>. We find that these four  
214 ribosomal proteins all covary positively and significantly with each other, providing  
215 evidence that they do not function in a mutually exclusive “switch-like” manner in single  
216 cells.

217

218 Importantly, applying our new method for measuring covariance enrichment over large  
219 gene sets (see section of CES score below), we find that genes sharing common Gene  
220 Ontology terms are 31% more likely to be covarying (1.31-fold covariance enrichment),  
221 while permuted control sets shows no such enrichment (Figure 1F). The same holds  
222 true for genes sharing common KEGG pathway annotation, where the enrichment is  
223 25% (Figure 1F). We conclude that genes sharing functions or pathways are more likely  
224 to be regulated in a similar fashion and hence tend to covary. In conclusion, the  
225 covarying gene pairs form a comprehensive scale-free network, which is associated with  
226 annotated cellular functions and pathways.

227

### 228 **Covariances retrace known aspects of stem cell biology**

229 The pluripotency of mouse embryonic stem cells has been studied extensively and  
230 several studies focus on characterizing their transcriptomes and gene regulatory circuits  
231 <sup>13,23-26</sup>. The network that we observe recapitulates many known relationships between  
232 pluripotency markers in mouse embryonic stem cells. For instance, positive covariances  
233 support the activation of *Fgf4* through *Nanog* and *Sox2* <sup>27,28</sup>, while negative covariances  
234 support the inhibition of *Dnmt3a/b/l* by *Prdm14* <sup>17,29</sup> and of *Dppa3* by *Tbx3* <sup>30</sup>. While our  
235 data support previous claims that *Nanog* is positively covarying with *Klf4*, *Sox2*, *Tet2*,



236 and *Kat6b*<sup>9</sup>, we see little support for a covariance with *Esrrb*, *Zfp42* and *Tet1* and we  
237 observe a significant negative covariance with *Pou5f1* and *Dnmt3a* in single cells. With  
238 regard to predicted pluripotency genes, we can confirm that there are strong  
239 covariances between *Etv5*, and weak covariances between *Ptma*, and *Zfp710* and other  
240 pluripotency genes. Covariances of pluripotency genes can be found in Suppl. Table 4. In  
241 summary, the detected covariances are in accordance with known gene expression  
242 patterns in stem cell biology, and gives hints to new connections.

243

#### 244 **Covariance enrichment score (CES)**

245 To systematically investigate the regulatory implications of the covariances, we defined  
246 the *Covariance Enrichment Score* (CES) for gene sets of interest. The CES indicates  
247 whether for a given gene set we observe fewer or more significant covariances between  
248 the genes than we would expect, based on a simple background model. Our background  
249 model considers the total number of significant covariances for each gene as well as the  
250 number of covariances of all its potential pairing genes. In short, it is the factor of the  
251 probabilities of two genes assuming that their covariances were distributed randomly,  
252 summing over all possible pairs in the gene set.

253

$$P(\text{signCov}(g_a, g_b)) = \frac{\sum_{i=1}^N \text{signCov}(g_a, g_i) \times \sum_{j=1}^N \text{signCov}(g_b, g_j)}{\sum_{i=1}^N \sum_{j=1}^N \text{signCov}(g_i, g_j)}$$

254

255

256 For instance, we assume that genes that are regulated by the same transcription factor  
257 will tend to covary, depending on the abundance and activity of the transcription factor  
258 in individual cells. In the next sections we test such hypotheses using CES, and in the  
259 case of one type of regulator (miRNAs) use a loss-of-function mutant cell line to validate  
260 that the observed covariances are indeed a direct effect of said regulator.

261

262

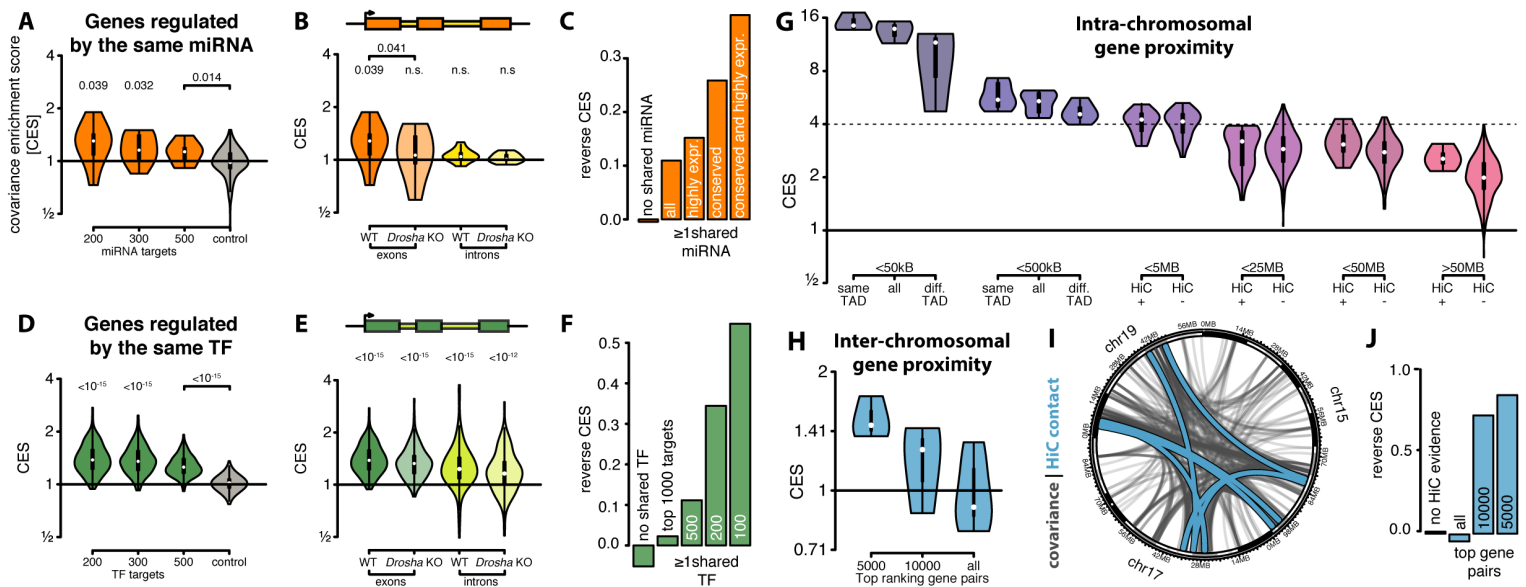

263

264 **Figure 2: miRNAs, transcription factors and nuclear organization define covariances. (A)**

265 miRNA targets tend to covary. Covariances enrichment scores (CES) for the top 200, 300 and 500

266 ranked miRNA targets according to TargetScan, for the seven highest expressed conserved

267 miRNA and for a control set for comparison for 300 randomly selected targets. P-values refer to

268 respective controls. **(B)** miRNA target covariances occur post-transcriptionally and are miRNA-

269 dependent. Enrichment in sets of the top 200 ranked miRNA targets in parental cells (WT) and

270 *Drossha* KO cells, that are void of canonical miRNAs. Enrichments are color coded for exonic reads,

271 representing post-transcriptional regulation (orange) or intronic reads representing

272 transcriptional regulation (yellow). **(C)** Covarying genes are enriched for shared miRNA

273 targeting. Reverse covariance enrichment shows the ratio between covariances that share a common miRNA

274 and permuted covariances that share a common miRNA. **(D)** Transcription

275 factor targets are enriched for gene covariances. Enrichment in sets of the top 200, 300 and 500

276 transcription factor targets, for 168 transcription factors profiled with ChIP-seq. Control for

277 comparison is shown for 500 randomly selected targets. P-values refer to respective controls. **(E)**

278 Transcription factor target covariances are transcriptional and miRNA-independent. Enrichment

279 in sets of the 200 ranked transcription factor targets in parental cells (WT) and *Drossha* KO cells.

280 Enrichments are color coded for exonic reads (dark green) or intronic reads (light green). **(F)**

281 Covarying genes are enriched for shared transcription factor targeting (figure similar to 2C). **(G)**

282 Genes that are in close nuclear proximity and locate to the same chromosome are enriched for

283 covariances. The range categories are mutually exclusive, for instance pairs of genes that are

284 <5MB apart are not included in the <25MB category. **(H)** Gene regions that are in close nuclear

285 proximity and locate to different chromosomes are enriched for covariances. Since relatively few

286 intra-chromosomal Hi-C contacts were identified, we here used a less stringent criteria (p-value

287 <0.05) cut-off to robustly identify significant covariances (Suppl. Methods) **(I)** Circos plot

288 showing significant covariances and Hi-C contacts for chromosomes 15, 17, and 19. Significantly

289 covarying gene pairs are connected by a light blue line. Inter-chromosomal Hi-C contacts are

290 shown as grey lines. **(J)** Covarying genes are enriched for inter-chromosomal Hi-C contacts

291 (figure similar to 2C).

292

293

## 294 **MiRNAs induce transcriptome-wide gene expression covariances**

295 We first apply the Covariance Enrichment Score to study the regulatory impact of  
296 miRNAs, which are important post-transcriptional regulators of gene expression  
297 (reviewed in Bartel, 2018). In most conditions, these small RNAs down-regulate the  
298 expression of protein coding genes by binding their mRNA transcripts and leading to  
299 their degradation <sup>32</sup>. This targeting takes place in the cytoplasm and is therefore  
300 spatially decoupled from transcriptional regulation.

301

302 We speculate that miRNA regulation of gene expression may be a source of gene  
303 covariances. For instance, if a miRNA is highly abundant in a given cell, its targets may  
304 be coordinately repressed, and we expect an enrichment of covariances for these  
305 targets. To test this hypothesis, we investigated the top-ranking miRNA targets  
306 according to TargetScan <sup>33</sup>, which is the most widely used catalog of miRNA-target  
307 interactions. In this study we focused on the seven highest expressed conserved miRNA  
308 families (including the miR-15 and miR-290 families) in mouse embryonic stem cells  
309 (Suppl. Table 5).

310

311 Strikingly, miRNA gene target sets are significantly enriched for gene covariances. In  
312 median the top 200 targets of each of the seven miRNA families are 31% more likely to  
313 covary with each other than expected ( $p=0.032$ ). The enrichments exhibited a gradient  
314 with the enrichment being stronger for the top-ranking targets compared to sets that  
315 also included lower ranking targets (Figure 2A). Introns are spliced out in the nucleus,  
316 so their abundances cannot be impacted by miRNA action in the cytosol. Consistent with  
317 this, miRNA targets do not significantly covary at the intron level (Figure 2B).

318

319 To exclude the possibility that these covariances originate from other post-  
320 transcriptional effectors, we investigated cells that are void of canonical miRNAs.  
321 DROSHA is an endonuclease involved in the biogenesis of miRNAs, without which  
322 canonical miRNAs cannot be produced. We used an inducible *Drosha* knock-out cell line  
323 to validate the miRNA dependence of these covariances (Methods), and sequenced the  
324 transcriptomes of 343 of these knock-out cells using clonal expansion from a single cell  
325 and sorting of cells in G2/M phase as described above. We have previously  
326 demonstrated the global loss of miRNAs in this particular cell line <sup>34</sup>. As expected, there  
327 is no covariance enrichment in miRNA target sets in *Drosha* knock-out cells (Figure 2B),  
328 demonstrating that these covariances are directly caused by miRNA activity.

329

330 We additionally investigated the “reverse covariance enrichment”. Here, we observe the  
331 set of all significantly covarying gene pairs and ask how often they are regulated by the  
332 same miRNA, compared to a background set (Methods). We find that covarying genes  
333 are 12% more likely to be co-regulated by the top 16 miRNAs, and 35% more likely to  
334 be regulated by the seven most highly expressed conserved miRNAs (Figure 2C),  
335 showing the importance of miRNA conservation and abundance in inducing covariances.  
336 It has previously been reported that individual miRNAs can induce gene covariances <sup>35</sup>,  
337 but here we for the first time show that this holds for the larger complement of miRNAs,  
338 transcriptome-wide, and that natural (non-induced) fluctuations of miRNA abundance  
339 or activity are sufficient to cause the covariances.

340

341 From a network perspective, we found that >6,000 high-confidence gene covariances  
342 were lost in the cells void of miRNAs, while less than 3,000 new covariances were  
343 gained (Suppl. Figure 7A). A substantial number of the genes that cease to covary were  
344 miRNA targets and the ratio of lost to gained covariances increase when high-confidence  
345 targets were considered (Suppl. Figure 7B). The genes that lost covariances were  
346 enriched in functions in RNA biology (Suppl. Figure 7F), including regulation of PolII  
347 regulation. The average number of covariances per gene decreased significantly in the  
348 miRNA-depleted cells, from 10.1 to 8.4 covariances, and the number of genes without  
349 covariances increased from 2,265 to 2,866 (Suppl. Figure 7D). Overall, this indicates a  
350 global loss of gene expression coordination in cells that are void of miRNAs.

351

### 352 **Genes regulated by the same transcription factors covary with each other**

353 To investigate how regulation by transcription factors influences covariance patterns,  
354 we studied the binding sites of 145 transcription factors for which mouse ES cell ChIP-  
355 seq data were deposited in the Cistrome database <sup>36</sup>. As for miRNAs, we observe a  
356 gradient in covariance enrichment which is stronger for the top-ranking transcription  
357 factor targets compared to lower ranking targets (Figure 2D). Importantly, transcription  
358 factor target sets are significantly enriched for gene covariances both on the exon and  
359 the intron level (Figure 2E), consistent with transcriptional regulation. In median, the  
360 top 150 ranked targets of these transcription factors are 39% more likely to covary on  
361 the exon level ( $p\text{-value} < 10^{-15}$ ) and 22% more likely to covary at the intron level ( $p\text{-}$   
362  $\text{value} < 10^{-15}$ ) than are background genes. As expected, the covariance enrichment of  
363 transcription factor targets is not significantly lowered in *Drosha* knock-out cells (Figure  
364 2E). In conclusion, genes that are regulated by the same transcription factor tend to  
365 covary, possibly due to stochastic variations in transcription factor abundance and

366 activity between individual cells. This effect acts on millions of gene pairs and the mean  
367 magnitude of the regulation is similar to what we describe for miRNA-specific  
368 regulation.

369

### 370 **Genes in nuclear proximity on same or different chromosomes covary**

371 Genes that neighbor on the same chromosome are known to show co-expression<sup>37</sup>; this  
372 also holds for genes within the same chromatin loop or within the same topologically  
373 associated domain (TAD). Further, the concept of transcription factories covers  
374 dynamically assembled complexes that facilitate transcription and are dependent on  
375 intra- or inter-chromosomal interactions<sup>38</sup>. To investigate covariance enrichment on  
376 genomic regions that are in proximity within the nucleus, we analyzed mouse  
377 embryonic stem cell Hi-C-seq data<sup>39,40</sup>. In the following, we define “proximal” genes as  
378 those whose interaction is supported by Hi-C data, whether the interaction is intra- or  
379 inter-chromosomal (Methods). Our data shows that genes which are proximal and  
380 located on the same chromosome are highly enriched for covariances (Figure 2G). Genes  
381 that are close in linear distance on the chromosome (<5 MB) are enriched 4-fold in  
382 covariances, while genes that are distal (>50 MB) are enriched 2.1-fold. This effect is  
383 also detectable at the intron level, confirming an origin in transcriptional regulation at  
384 the level of nascent transcripts (Suppl. Fig. 10). Genes that are on the same chromosome  
385 are almost twice (1.9-fold) more likely to covary than expected even when their  
386 proximity is not supported by Hi-C (Figure 2G, furthest right). However, the highest  
387 enrichment was detected for genes that are in close in linear distance on the same  
388 chromosome and predicted to be in the same TAD, which are ~15-fold more likely to  
389 covary (Figure 2G, furthest left). Intriguingly, proximal genes on different chromosomes  
390 also show substantial covariance enrichment (Figure 2H-J), supporting the notion of  
391 transcription factories that incorporate areas from multiple chromosomes.

392

393

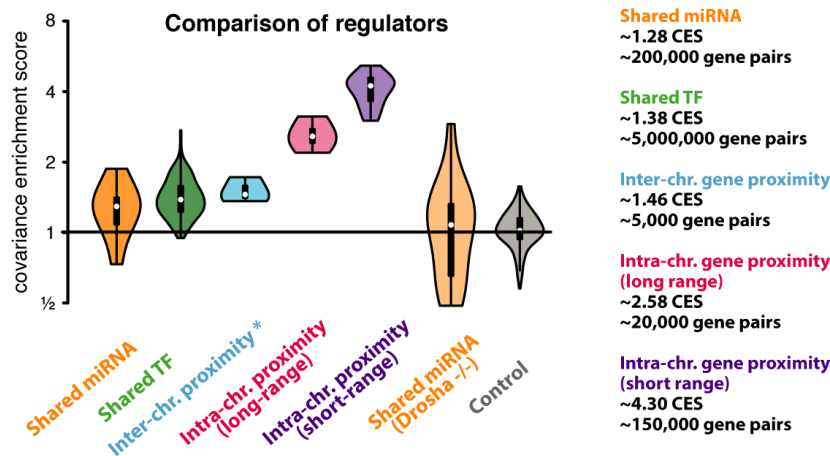

394

395 **Figure 3: Relative importance of miRNAs, transcription factors and nuclear proximity for**  
396 **covariances.** Comparison of covariance enrichment (CES) scores for genes that are either  
397 regulated by the same miRNA, regulated by the same transcription factor or that are in nuclear  
398 proximity – divided into intra- and inter-chromosomal pairs. The *Droscha* -/- cells are devoid of  
399 miRNAs, and the control gene sets are generated by computationally selecting background genes.  
400

401 Next, we ranked the relative importance of transcription factors, miRNAs and nuclear  
402 proximity for the regulation of covariation (Figure 3). We found that miRNA targets  
403 were 35% more likely to covary, transcription factor targets were 39% more likely to  
404 covary, genes in nuclear proximity on different chromosome were 3-fold more likely to  
405 covary, and, remarkably, genes that are proximal on the same chromosome are 5.3-fold  
406 more likely to covary. In summary, we find that transcriptional regulation, miRNA-  
407 mediated regulation, and surprisingly, inter-chromosomal nuclear proximity all play  
408 important roles, while the intra-chromosomal nuclear proximity is the strongest  
409 predictor of gene expression covariances.

410

411

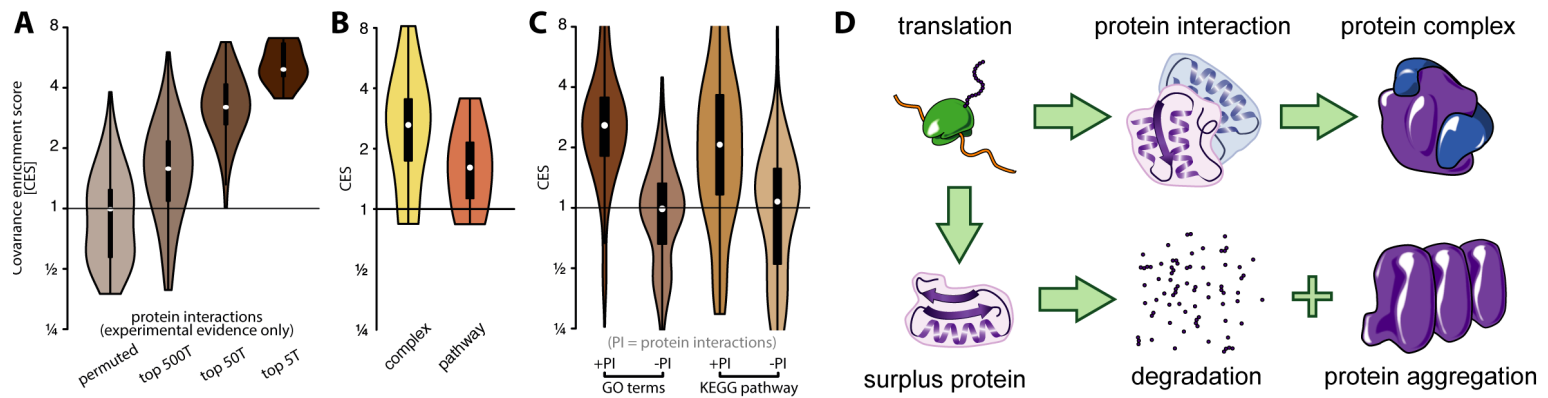

412

413 **Figure 4: Proteins that physically interact are specifically enriched in covariances at the**

414 **RNA level. (A)** Genes that interact on the protein level are highly enriched for covariances.

415 Covariance enrichment of genes that are annotated to be interacting on the protein level

416 according to the STRING database. **(B)** Covariances enrichment for genes whose protein products

417 are part of the same physical complex and for genes that are part of the same reaction (pathway).

418 **(C)** Gene covariances are mainly driven by protein interaction. Covariance enrichment of genes

419 sharing the same GO annotation or KEGG pathway annotation. GO and KEGG annotations are

420 stratified into pairs with shared annotation and experimentally identified protein interaction

421 (+PI) and shared annotation but lack of experimentally identified protein interaction (-PI). **(D)**

422 Model. Heteromeric protein complexes require proper stoichiometry of protein components.

423 Proteins that are in surplus can be degraded, mis-folded or form aggregates.

424

425 **Protein interaction rather than shared function drives gene covariances**

426 Next, we examined putative functions of the covariances that we observe in single cells.

427 We formulated two hypotheses. The first hypothesis can be described as the “*pathway*

428 *hypothesis*” – that genes involved in the same pathway are coordinated in expression, for

429 instance to avoid bottlenecks in the production of metabolic intermediates <sup>41</sup>. The

430 second hypothesis is the “*complex hypothesis*” – that covariances ensure correct

431 stoichiometry among proteins that are part of the same heteromeric protein complex,

432 since surplus proteins may mis-fold or even cause aggregates <sup>42</sup>.

433

434 As stated earlier, genes that share the same Gene Ontology function or process or the

435 same KEGG pathway annotation are significantly enriched for gene covariances (Figure

436 1F). The same is true for genes that physically interact on the protein level according to

437 experimental evidence gathered by the STRING database (Figure 4A). For these

438 interactions we can see a gradient with those interactions with the highest

439 confidence/affinity score also having the highest enrichment for covariances. We further

440 find that genes that contribute to the same complex are 2.6-fold more likely to covary,

441 compared to just 1.6-fold for genes that are part of the same pathway (Figure 4B),

442 lending support to the “*complex hypothesis*”.

443

444 To further test the two hypotheses, we split the set of functionally related genes into one  
 445 set with genes that share a functional annotation and protein interaction and those that  
 446 share functional annotation but no protein interaction. If the “pathway hypothesis”  
 447 holds, we would expect both gene sets to covary, since they share functions. If the  
 448 “complex hypothesis” holds, we would expect only the genes whose proteins physically  
 449 interact to covary, since the covariances are needed for proper stoichiometry of proteins  
 450 in the complexes. Strikingly, we find no covariance enrichment for either of the GO and  
 451 KEGG functional annotations if genes that physically interact at the protein level are  
 452 excluded from the analysis (Figure 4C). In other words, there is no covariance  
 453 enrichment for proteins in the same pathway, if there is no evidence that they physically  
 454 interact. Altogether, we present evidence that support direct interactions between  
 455 proteins in the same complex (Figure 4B-D) as a selector for covariances, rather than  
 456 pathway stoichiometry.  
 457

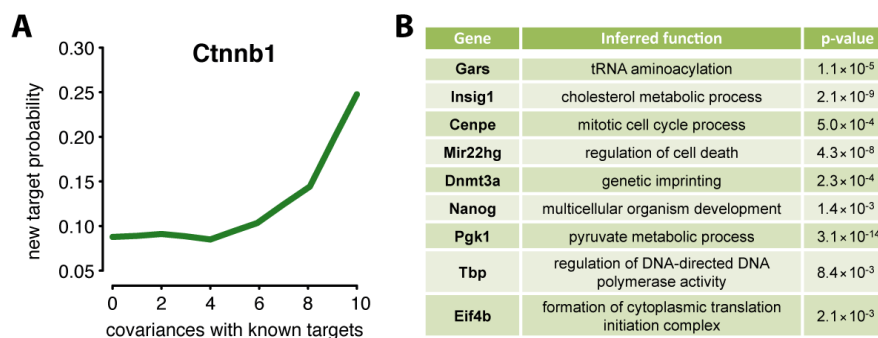

458  
 459 **Figure 5: Gene covariance information can predict regulatory targets. (A)** Genes that covary  
 460 with transcription factor targets are likely targets of the same factor (Ctnnb1) and can be  
 461 validated by ChIP-seq. Probability for genes that share a certain number of significant  
 462 covariances with the top 100 targets identified via ChIP-seq to be identified *de novo* in an  
 463 independent second ChIP-seq experiment. **(B)** Examples of genes whose function was  
 464 determined purely from the functional annotation of covarying genes.  
 465

#### 466 Predictive power of gene covariances

467 We next investigated if our observed covariances can be used to predict genes that share  
 468 upstream regulators by a “guilt-by-association” principle. We hypothesize that if a gene  
 469 of interest covaries with numerous known targets of a transcription factor, it is likely a  
 470 target of said factor. To test this hypothesis, we noted all genes that had been identified  
 471 as targets of the transcription factor Ctnnb1 in a mouse ES cell ChIP-seq experiment <sup>43</sup>.  
 472 This gene is known to regulate cell adhesion and has been linked to various cancer  
 473 phenotypes <sup>44</sup>. We then ranked all other genes according to how many of the top 100



474 Ctnnb1 targets they covary with, and observed that the more covariances a gene  
475 exhibited, the more likely it is to be bound by Ctnnb1 in a second ChIP-seq experiment <sup>43</sup>  
476 (Figure 5A). In other words, the more significant covariances a gene had with the high  
477 confidence targets identified in the first experiment, the more often it was observed  
478 among the high confidence targets identified in a second independent experiment. While  
479 the predictive power of our method is limited (target probability ~ 25%, Figure 5A) it  
480 serves as a proof of principle that single-cell transcriptome data can be used for  
481 predicting regulatory relations even in a homogeneous cell population. This approach  
482 could be used to make sparse data sets more complete, through “guilt-by-association”  
483 with previously identified targets or to identify targets that escape current technologies  
484 due to biases. Last, we found that the function of genes could be inferred by surveying  
485 functional annotations of covarying genes (Figure 5B, Methods). This may not only aid  
486 functional annotation but could also reveal hidden gene functions, so called  
487 moonlighting. In conclusion, knowledge of gene covariances across single cells can be  
488 used to infer gene function and regulation through associations.

489

490

## 491 Discussion

492

493 We show that statistically robust and biologically meaningful gene covariances can be  
494 detected in homogeneous non-dynamic single cell populations. Evidence to support this  
495 claim include: the validation by alternative statistical methods, a low estimated false  
496 discovery rate, the recovery of known regulatory patterns, and a power-law distribution  
497 of network edges commonly found in biological networks. Our experimental set-up  
498 allows for the study of widespread gene expression covariances unrelated to cell cycle  
499 and other dynamic changes in the cells such as differentiation. Strikingly, all major  
500 regulatory mechanisms – post-transcriptional, transcriptional and by nuclear proximity  
501 – influence covariance patterns. We confirmed experimentally the importance of post-  
502 transcriptional regulation by miRNAs by showing that loss of miRNAs results in a  
503 specific loss of a subset of covariances.

504

505 Based on our findings, we propose a hierarchy of gene covariance regulation. We place  
506 regulation via intra-chromosomal proximity first because of the strength of the effect,  
507 and transcription factors second because of the size of the affected target pool (Figure  
508 3). The influence of inter-chromosomal proximity and miRNA regulation is  
509 comparatively smaller although still substantial. As targets of the same regulator tend to  
510 covary as well as genes that are part of the same functional units, covariances have been  
511 used to predict gene function and regulation. We show that we not only recover known  
512 gene functions and transcription factor targeting but, as a proof of principle, also  
513 showed the predictive potential for both gene function and regulation.

514

515 Importantly, we find that covarying genes only tend to share the same function if their  
516 encoded proteins also physically interact, suggesting a role in protein complex  
517 stoichiometry. The induction of gene expression covariation could be beneficial to cells  
518 as it is well understood that the formation of heteromeric protein complexes is often  
519 needed for proper folding and stability of the proteins involved <sup>45</sup>. In bacteria, spatial  
520 separation of the translation of such proteins leads to misfolding events <sup>46</sup>. It is  
521 conceivable that temporal separation might result in similar effects. The production of  
522 misfolded proteins that have to be removed by degradation is costly from an energetic  
523 point of view, and accumulation of misfolded protein can have lethal consequences for  
524 cells (Figure 4D). Therefore, we suggest that establishing expression covariance of such  
525 genes already on the RNA level might be an advantage in evolutionary terms.

526

527 In this study we measure RNA rather than protein with the latter being closer to the  
528 cellular phenotype. However, when inferring upstream regulation, it may be more  
529 informative to measure RNA. Further, many of the interesting and biologically  
530 meaningful covariances that we discover may not be detectable at the protein level, even  
531 in single cells. For instance, transcript covariances may be important for co-folding, but  
532 they may not be visible at the proteome level for proteins that have long half-lives and  
533 that are therefore stably expressed. It will be exciting to study covariances at the protein  
534 level, when technologies to accurately profile hundreds of proteins in single cells  
535 become available.

536

537 Gene co-expression studies have been conducted on pools of cells for decades, yielding  
538 important insights into covariances and network properties. However, these studies  
539 have been limited in their capacity to study changes to network properties following a  
540 genetic perturbation. For instance, to study the effects of *Drosha* knockout using pooled  
541 cells, it would be necessary to ablate the gene in dozens or hundreds of cell lines in  
542 parallel to have the statistical strength to call covariances. In contrast, our study serves  
543 as a proof-of-concept that it is possible to delete the gene in a single cell line, and then  
544 consider each of hundreds of individual cells as an independent condition, thus  
545 obtaining the statistical power to resolve network properties in one experiment. In our  
546 study we find that many more covariances are lost than gained in the *Drosha* knockout  
547 cells, and we observe a general loss of network connectivity. This highlights the  
548 importance of miRNAs in maintaining gene expression synchronicity and global gene  
549 network connectivity; an insight that would be difficult to obtain with bulk cell or  
550 classical single-gene approaches. In summary, we demonstrate that the combination of  
551 single-cell sequencing, gene covariance analysis and genetic perturbations can yield  
552 insights into robustness of regulatory networks with unprecedented ease and depth.

553

554 A previous study of RNA and protein covariances using samples from bulk cell  
555 populations <sup>37</sup> found that neighboring genes on the same chromosomes are often co-  
556 expressed at the RNA level, but are however not functionally related and that the  
557 covariances do not translate to the protein level. To the contrary, we observe that gene  
558 pairs in nuclear proximity that share an interaction on the protein level are in fact 7.5-  
559 times enriched compared to background, suggesting a specific co-occurrence of nuclear  
560 proximity, RNA covariance and shared function. Further, using a database for bulk cell  
561 protein expression covariances <sup>47</sup>, we find that 21% of our observed RNA covariances in  
562 fact translate to the protein level, compared to 6% for background genes. The apparent

563 contrast between these results may originate from the fact that the previous study was  
564 conducted in immortalized primary cell lines from human individuals <sup>37</sup>, where genetic  
565 variants that strongly impact protein levels may have been specifically selected against  
566 by evolution. In contrast, temporal fluctuations of protein levels may be tolerated in  
567 individual cells from cell lines, allowing more refined measurements. This highlights the  
568 advantages of studying variation of gene regulation at the single-cell level.

569

570 It has been proposed that while prokaryotes use co-transcribed operons to ensure  
571 synchronized expression and stoichiometry of proteins in common pathways or  
572 complexes, eukaryotes use post-transcriptional regulation to ensure a similar outcome  
573 at the RNA level. The integrated effect of dispersed transcription and coordinated post-  
574 transcriptional regulation has been named '*RNA operons*' or '*Regulons*' <sup>48</sup>. Our results  
575 support that eukaryotic post-transcriptional regulation by for instance miRNAs can  
576 coordinate gene expression at the RNA level, but we also provide evidence that  
577 substantial functional regulation occurs at the level of nuclear organization, by genes on  
578 the same chromosome or by genes that are in proximity although on distinct  
579 chromosomes.

580

581

## 582 References

- 583 1. Segal, E. *et al.* Module networks: identifying regulatory modules and their condition-  
584 specific regulators from gene expression data. *Nat. Genet.* **34**, 166–176 (2003).
- 585 2. Stuart, J. M., Segal, E., Koller, D. & Kim, S. K. A Gene-Coexpression Network for Global  
586 Discovery of Conserved Genetic Modules Joshua. *October* **302**, 249–255 (2003).
- 587 3. De Smet, R. & Marchal, K. Advantages and limitations of current network inference  
588 methods. *Nat. Rev. Microbiol.* **8**, 717–729 (2010).
- 589 4. Tang, F. *et al.* mRNA-Seq whole-transcriptome analysis of a single cell. *Nat. Methods* **6**,  
590 377–382 (2009).
- 591 5. Islam, S. Characterization of the single-cell transcriptional landscape by highly multiplex  
592 RNA-seq. *Genome Res.* **7**, 194–6 (2010).
- 593 6. Picelli, S. *et al.* Smart-seq2 for sensitive full-length transcriptome profiling in single cells.  
594 *Nat. Methods* **10**, 1096–8 (2013).
- 595 7. Farahbod, M. & Pavlidis, P. Untangling the effects of cellular composition on coexpression  
596 analysis. (2019).
- 597 8. Buettner, F. *et al.* Computational analysis of cell-to-cell heterogeneity in single-cell RNA-  
598 sequencing data reveals hidden subpopulations of cells. *Nat. Biotechnol.* **33**, 155–160  
599 (2015).
- 600 9. Kolodziejczyk, A. A. *et al.* Single Cell RNA-Sequencing of Pluripotent States Unlocks  
601 Modular Transcriptional Variation. *Cell Stem Cell* **17**, 471–485 (2015).
- 602 10. Svensson, V. *et al.* Power analysis of single-cell rna-sequencing experiments. *Nat. Methods*  
603 **14**, 381–387 (2017).
- 604 11. Natarajan, K. N. *et al.* Comparative analysis of sequencing technologies for single-cell  
605 transcriptomics. *Genome Biol.* **20**, 1–8 (2019).
- 606 12. La Manno, G. *et al.* RNA velocity of single cells. *Nature* **560**, 494–498 (2018).
- 607 13. Marks, H. *et al.* The transcriptional and epigenomic foundations of ground state  
608 pluripotency. *Cell* **149**, 590–604 (2012).
- 609 14. Habibi, E. *et al.* Whole-genome bisulfite sequencing of two distinct interconvertible DNA  
610 methylomes of mouse embryonic stem cells. *Cell Stem Cell* **13**, 360–369 (2013).
- 611 15. Jasnos, L., Aksoy, F. B., Hersi, H. M., Wantuch, S. & Sawado, T. Identifying division  
612 symmetry of mouse embryonic stem cells: Negative impact of DNA methyltransferases on  
613 symmetric self-renewal. *Stem Cell Reports* **1**, 360–369 (2013).
- 614 16. Santos, A., Wernersson, R. & Jensen, L. J. Cyclebase 3.0: A multi-organism database on cell-  
615 cycle regulation and phenotypes. *Nucleic Acids Res.* **43**, D1140–D1144 (2015).
- 616 17. Yamaji, M. *et al.* PRDM14 ensures naive pluripotency through dual regulation of signaling  
617 and epigenetic pathways in mouse embryonic stem cells. *Cell Stem Cell* **12**, 368–382  
618 (2013).
- 619 18. Albert, R. Scale-free networks in cell biology. *J. Cell Sci.* **118**, 4947–4957 (2005).
- 620 19. Yokoyama, C. *et al.* SREBP-1, a basic-helix-loop-helix-leucine zipper protein that controls  
621 transcription of the low density lipoprotein receptor gene. *Cell* **75**, 187–197 (1993).

- 622 20. Yaffe, M. B. *et al.* TCP1 complex is a molecular chaperone in tubulin biogenesis. *Nature*  
623 **358**, 245–248 (1992).
- 624 21. Liu, C. T., Yuan, S. & Li, K. C. Patterns of co-expression for protein complexes by size in  
625 *Saccharomyces cerevisiae*. *Nucleic Acids Res.* **37**, 526–532 (2009).
- 626 22. Shi, Z. *et al.* Heterogeneous Ribosomes Preferentially Translate Distinct Subpools of  
627 mRNAs Genome-wide. *Mol. Cell* **67**, 71–83.e7 (2017).
- 628 23. Dunn, S.-J., Martello, G., Yordanov, B., Emmott, S. & Smith, A. G. Defining an essential  
629 transcription factor program for naïve pluripotency. *Science (80-. )*. **344**, 1156 LP – 1160  
630 (2014).
- 631 24. Kushwaha, R., Jagadish, N., Kustagi, M., Tomishima, M. J., Mendiratta, G., Bansal, M., Kim, H.  
632 R., Sumazin, P., Alvarez, M. J., Lefebvre, C., Villagrasa-Gonzalez, P., Viale, A., Korkola, J. E.,  
633 Houldsworth, J., Feldman, D. R., Bosl, G. J., Califano, A. an, R. S. Interrogation of a Context-  
634 Specific Transcription Factor Network Identifies Novel Regulators of Pluripotency. *Stem*  
635 *Cells* **33**, 367–377 (2013).
- 636 25. Gosline, S. J. C. *et al.* Elucidating MicroRNA Regulatory Networks Using Transcriptional,  
637 Post-transcriptional, and Histone Modification Measurements. *Cell Rep.* **14**, 310–319  
638 (2016).
- 639 26. Ha, M. & Hong, S. Gene-regulatory interactions in embryonic stem cells represent cell-type  
640 specific gene regulatory programs. *Nucleic Acids Res.* **45**, 10428–10435 (2017).
- 641 27. Herberg, M. *et al.* Dissecting mechanisms of mouse embryonic stem cells heterogeneity  
642 through a model-based analysis of transcription factor dynamics. (2016).
- 643 28. Herberg M, Kalkan T, Glauche I, Smith A, R. I. A Model-Based Analysis of Culture-  
644 Dependent Phenotypes of mESCs. **9**, 1–12 (2014).
- 645 29. Leitch, H. G. *et al.* Naive pluripotency is associated with global DNA hypomethylation. *Nat.*  
646 *Struct. Mol. Biol.* **20**, 311–316 (2013).
- 647 30. Waghray, A. *et al.* Tbx3 Controls Dppa3 Levels and Exit from Pluripotency toward  
648 Mesoderm. *Stem Cell Reports* **5**, 97–110 (2015).
- 649 31. Bartel, D. P. Metazoan MicroRNAs. *Cell* **173**, 20–51 (2018).
- 650 32. Eichhorn, S. W. *et al.* mRNA Destabilization Is the dominant effect of mammalian  
651 microRNAs by the time substantial repression ensues. *Mol. Cell* **56**, 104–115 (2014).
- 652 33. Agarwal, V., Bell, G. W., Nam, J. W. & Bartel, D. P. Predicting effective microRNA target sites  
653 in mammalian mRNAs. *Elife* **4**, (2015).
- 654 34. Bonath, F., Domingo-Prim, J., Tarbier, M., Friedländer, M. R. & Visa, N. Next-generation  
655 sequencing reveals two populations of damage-induced small RNAs at endogenous DNA  
656 double-strand breaks. *Nucleic Acids Res.* **46**, 11869–11882 (2018).
- 657 35. Rzepiela, A. J. *et al.* Single-cell mRNA profiling reveals the hierarchical response of mi  
658 RNA targets to mi RNA induction. *Mol. Syst. Biol.* **14**, 1–15 (2018).
- 659 36. Mei, S. *et al.* Cistrome Data Browser: A data portal for ChIP-Seq and chromatin  
660 accessibility data in human and mouse. *Nucleic Acids Res.* **45**, D658–D662 (2017).
- 661 37. Kustatscher, G., Grabowski, P. & Rappsilber, J. Pervasive coexpression of spatially

- 662 proximal genes is buffered at the protein level. *Mol. Syst. Biol.* **13**, 937 (2017).
- 663 38. Fanucchi, S. *et al.* Chromosomal contact permits transcription between coregulated genes.  
664 *Cell* **155**, 606–20 (2013).
- 665 39. Dixon, J. R. *et al.* Topological domains in mammalian genomes identified by analysis of  
666 chromatin interactions. *Nature* **485**, 376–380 (2012).
- 667 40. Kaufmann, S. *et al.* Inter-chromosomal contact networks provide insights into mammalian  
668 chromatin organization. *PLoS One* **10**, 1–25 (2015).
- 669 41. Lalanne, J. B. *et al.* Evolutionary Convergence of Pathway-Specific Enzyme Expression  
670 Stoichiometry. *Cell* **173**, 749–761.e38 (2018).
- 671 42. Papp, B., Pál, C. & Hurst, L. D. Dosage sensitivity and the evolution of gene families in  
672 yeast. *Nature* **424**, 194–197 (2003).
- 673 43. Zhang, X., Peterson, K. A., Liu, X. S., McMahon, A. P. & Ohba, S. Gene regulatory networks  
674 mediating canonical wnt signal-directed control of pluripotency and differentiation in  
675 embryo stem cells. *Stem Cells* **31**, 2667–2679 (2013).
- 676 44. Salas, S., Chibon, F., Noguchi, T., Terrier, P., Ranchere-Vince, D., Lagarde, P., Benard, J.,  
677 Forget, S., Blanchard, C., Dômont, J., Bonvalot, S., Guillou, L., Leroux, A., Mechine-  
678 Neuville, A., Schöffski, P., Laë, M., Collin, F., Verola, J. Molecular characterization by array  
679 comparative genomic hybridization and DNA sequencing of 194 desmoid tumors. *Genes*  
680 *Chromosom. Cancer.* **56**, 89–116 (2017).
- 681 45. Webb, E. C. & Westhead, D. R. The transcriptional regulation of protein complexes; a  
682 cross-species perspective. *Genomics* **94**, 369–376 (2009).
- 683 46. Shieh, Y.-W. *et al.* Operon structure and cotranslational subunit association direct protein  
684 assembly in bacteria. *Science (80-. )*. **350**, 678–680 (2015).
- 685 47. Wang, M., Herrmann, C. J., Simonovic, M., Szklarczyk, D. & von Mering, C. Version 4.0 of  
686 PaxDb: Protein abundance data, integrated across model organisms, tissues, and cell-  
687 lines. *Proteomics* **15**, 3163–3168 (2015).
- 688 48. Keene, J. D. RNA regulons: Coordination of post-transcriptional events. *Nat. Rev. Genet.* **8**,  
689 533–543 (2007).
- 690
- 691

692 **Acknowledgements**

693 We acknowledge the following funding sources: ERC Starting Grant 758397, 'miRCell';  
694 Swedish Research Council (VR) grant 2015-04611, 'MapToCleave'; and funding from the  
695 Strategic Research Area (SFO) program of the Swedish Research Council through  
696 Stockholm University. The computations were performed on resources provided by  
697 SNIC through Uppsala Multidisciplinary Center for Advanced Computing Science  
698 (UPPMAX). The Smart-Seq2 data were generated by the Eukaryotic Single Cell Genomics  
699 (ESCG) and sc-qPCR was facilitated by the Single Cell Proteomics facilities at Science for  
700 Life Laboratory, Uppsala. We also thank CRG (the Center for Genomic Regulation) for  
701 support in the early pilot phase of the project. Special thanks to Marie Öhman, Johan Elf,  
702 and Claes Andréasson, as well as the Kutter and Pelechano labs for their feedback and  
703 input.

704

705

706 **Author contributions**

707 J.F., S.C-S., D.B.M, L.Z. and M.R.F. conceived the project. S.D.M. performed sequence  
708 mapping, expression quantification and quality control and M.T. performed all further  
709 computational analyses, which were supervised by M.R.F. J.F. and S.C-S. performed cell  
710 perturbation and sorting experiments. E.G. performed and M.B. supervised smFISH  
711 validations. C.J.G. performed single-cell qPCR validations. I.B. contributed to smFISH and  
712 single-cell qPCR validations. L.Z. performed and S.O. supervised early pilot phase  
713 computational analyses. M.T. and M.R.F. wrote the manuscript, with contributions from  
714 all authors.

715

716

717 **Author Information**

718 Sequencing data have been deposited at GEO under accession number XXXX. The  
719 authors declare no competing financial interests. Readers are welcome to comment on  
720 the online version of the paper. Correspondence and requests for materials should be  
721 addressed to M.R.F. ([marc.friedlander@scilifelab.se](mailto:marc.friedlander@scilifelab.se)).

722



## 723 **Methods Summary**

724 *Drosha*<sup>ko</sup> cells were generated using the *Drosha*<sup>F</sup> mouse embryonic stem cell line (Chong  
725 et al, 2008) containing the tamoxifen-inducible LoxP - *exon9* - LoxP and a neomycin  
726 selection cassette. The *Drosha*<sup>ko</sup> cells were propagated for three passages in 2i media  
727 containing mouse LIF. For single-cell sequencing, the *Drosha*<sup>ko</sup> cells were stained with  
728 Hoechst-33342 and propidium iodide, then sorted in G2/M using a BD Influx (BD  
729 Bioscience). Dual-indexed cDNA libraries were prepared using the Illumina NexteraXT  
730 dual index library prep kit following the SmartSeq2 protocol (Picelli: 24056875). cDNA  
731 libraries were pooled and 50-bp single-end sequencing was performed on an Illumina  
732 HiSeq 2000 platform. The reads were mapped against the mm10 mouse genome using  
733 Tophat, and duplicates were removed using Samtools. Only reads that mapped to a  
734 unique genome position that overlapped a single gene annotation were considered.  
735 Individual cells that did not pass stringent mapping criteria, or that were assigned to S  
736 or G1 phase by the cyclone function of the SCRAN package, were discarded. Read counts  
737 for each cell was normalized to reads per million (RPM). Genes were subsequently  
738 excluded from the analysis if they were not detectably expressed in at least half of all  
739 cells in each condition and replicate. Pairs of genes were considered significantly  
740 covarying if they were correlated by Spearman's ranked test ( $p < 0.01$ ) in at least two out  
741 of three replicates. Transcription factor targets were retrieved from the Cistrome  
742 database and miRNA targets were obtained from TargetScanMouse Release 7.1. Targets  
743 were ranked by the total amount of 8mer sites, the total amount of m8-7mer sites and  
744 the cumulative weighted context score.
